# Supplementary material
Source: publisher figshare collection journal article supplement (https://sage.figshare.com/ndownloader/files/24233756)
Supplement: Supplementary file 1 [file 24233756]

## Appendix

|                    | CONCEPT I                                                                                                                                 | AND | CONCEPT II                                                                                                                                                                                                                          | AND | CONCEPT III                                                                                                                                                                                                                                                                                                                            |
|--------------------|-------------------------------------------------------------------------------------------------------------------------------------------|-----|-------------------------------------------------------------------------------------------------------------------------------------------------------------------------------------------------------------------------------------|-----|----------------------------------------------------------------------------------------------------------------------------------------------------------------------------------------------------------------------------------------------------------------------------------------------------------------------------------------|
| <b>MeSH term</b>   | Recurrent respiratory papillomatosis<br>Respiratory tract infections<br>Papillomavirus infections                                         |     | Solid-state lasers<br>Gas lasers<br>Dye lasers                                                                                                                                                                                      |     | Ambulatory surgical procedures<br>Operative surgical procedures<br>Operating rooms                                                                                                                                                                                                                                                     |
| <b>EMTREE term</b> | Larynx papillomatosis<br>Benign respiratory tract tumor                                                                                   |     | Potassium titanyl phosphate laser<br>Carbon dioxide laser<br>Pulsed dye laser<br>Dye laser<br>Laser coagulation<br>Laser surgery<br>Otorhinolaryngology microdebrider<br>Debridement<br>Local excision                              |     | Ambulatory care<br>Operating room                                                                                                                                                                                                                                                                                                      |
| <b>Keywords</b>    | Laryngeal papilloma<br>Laryngeal papillomas<br>Respiratory tract infection<br>Papillomavirus infection<br>Benign respiratory tract tumors |     | KTP laser<br>KTP lasers<br>Solid-state laser<br>Potassium Titanyl Phosphate Lasers<br>Carbon dioxide lasers<br>Gas laser<br>CO2 laser<br>CO2 lasers<br>Pulsed dye lasers<br>Laser surgeries<br>Microdebrider<br>Cold knife excision |     | Office<br>Office visit<br>Office visits<br>Office procedure<br>Office procedures<br>Ambulatory surgical procedure<br>Ambulatory surgery<br>Ambulatory surgeries<br>Outpatient surgery<br>Outpatient surgeries<br>Office surgery<br>Office surgeries<br>Day surgery<br>Day surgeries<br>Operating rooms<br>Operative surgical procedure |

**Table 1a. Search strategy by concept for Pubmed and EMBASE on outcomes of RRP treated in the office vs outcomes of RRP treated in the operating room**

Search Strategies Performed for the Systematic Review:

PubMed/MEDLINE

Date searched: 10/4/2019

Applied Database Supplied Limits: Humans

Number of Results: 2165

Full Search Strategy:

(recurrent respiratory papillomatosis OR laryngeal papilloma OR laryngeal papillomas OR respiratory tract infection OR respiratory tract infections OR papillomavirus infection OR papillomavirus infections OR larynx papillomatosis OR benign respiratory tract tumor OR benign respiratory tract tumors) AND (KTP laser OR KTP lasers OR solid-state laser OR solid-state lasers OR potassium titanyl phosphate laser OR potassium titanyl phosphate lasers OR carbon dioxide laser OR carbon dioxide lasers OR gas laser OR gas lasers OR CO2 laser OR CO2 lasers OR pulsed dye laser OR pulsed dye lasers OR dye laser OR dye lasers OR laser

coagulation OR laser surgery OR laser surgeries OR microdebrider OR otorhinolaryngology microdebrider OR debridement OR cold knife excision OR local excision) AND (office OR office visit OR office visits OR office procedure OR office procedures OR Ambulatory Surgical Procedures OR Ambulatory surgical procedure OR ambulatory surgery OR ambulatory surgeries OR outpatient surgery OR outpatient surgeries OR day surgery OR day surgeries OR ambulatory care OR operating room OR operating rooms OR operative surgical procedures OR operative surgical procedure OR ambulatory care OR office surgery OR office surgeries)

EMBASE (Ovid)

Date searched: 10/4/2019

Applied Database Supplied Limits: n/a

Number of Results: 42

Full Search Strategy:

(recurrent respiratory papillomatosis OR laryngeal papilloma OR laryngeal papillomas OR respiratory tract infection OR respiratory tract infections OR papillomavirus infection OR papillomavirus infections OR larynx papillomatosis OR benign respiratory tract tumor OR benign respiratory tract tumors) AND (KTP laser OR KTP lasers OR solid-state laser OR solid-state lasers OR potassium titanyl phosphate laser OR potassium titanyl phosphate lasers OR carbon dioxide laser OR carbon dioxide lasers OR gas laser OR gas lasers OR CO2 laser OR CO2 lasers OR pulsed dye laser OR pulsed dye lasers OR dye laser OR dye lasers OR laser coagulation OR laser surgery OR laser surgeries OR microdebrider OR otorhinolaryngology microdebrider OR debridement OR cold knife excision OR local excision) AND (office OR office visit OR office visits OR office procedure OR office procedures OR Ambulatory Surgical Procedures OR Ambulatory surgical procedure OR ambulatory surgery OR ambulatory surgeries OR outpatient surgery OR outpatient surgeries OR day surgery OR day surgeries OR ambulatory care OR operating room OR operating rooms OR operative surgical procedures OR operative surgical procedure OR ambulatory care OR office surgery OR office surgeries)

Biological Abstracts

Date searched: 10/4/2019

Applied Database Supplied Limits: n/a

Number of Results: 34

Full Search Strategy:

(recurrent respiratory papillomatosis OR laryngeal papilloma OR laryngeal papillomas OR respiratory tract infection OR respiratory tract infections OR papillomavirus infection OR papillomavirus infections OR larynx papillomatosis OR benign respiratory tract tumor OR benign respiratory tract tumors) AND (KTP laser OR KTP lasers OR solid-state laser OR solid-state lasers OR potassium titanyl phosphate laser OR potassium titanyl phosphate lasers OR carbon dioxide laser OR carbon dioxide lasers OR gas laser OR gas lasers OR CO2 laser OR CO2 lasers OR pulsed dye laser OR pulsed dye lasers OR dye laser OR dye lasers OR laser coagulation OR laser surgery OR laser surgeries OR microdebrider OR otorhinolaryngology microdebrider OR debridement OR cold knife excision OR local excision) AND (office OR office visit OR office visits OR office procedure OR office procedures OR Ambulatory Surgical Procedures OR Ambulatory surgical procedure OR ambulatory surgery OR ambulatory surgeries OR outpatient surgery OR outpatient surgeries OR day surgery OR day surgeries OR ambulatory

care OR operating room OR operating rooms OR operative surgical procedures OR operative surgical procedure OR ambulatory care OR office surgery OR office surgeries)

#### Biosis Citation Index

Date searched: 10/4/2019

Applied Database Supplied Limits: n/a

Number of Results: 6

#### Full Search Strategy:

(recurrent respiratory papillomatosis OR laryngeal papilloma OR laryngeal papillomas OR respiratory tract infection OR respiratory tract infections OR papillomavirus infection OR papillomavirus infections OR larynx papillomatosis OR benign respiratory tract tumor OR benign respiratory tract tumors) AND (KTP laser OR KTP lasers OR solid-state laser OR solid-state lasers OR potassium titanyl phosphate laser OR potassium titanyl phosphate lasers OR carbon dioxide laser OR carbon dioxide lasers OR gas laser OR gas lasers OR CO2 laser OR CO2 lasers OR pulsed dye laser OR pulsed dye lasers OR dye laser OR dye lasers OR laser coagulation OR laser surgery OR laser surgeries OR microdebrider OR otorhinolaryngology microdebrider OR debridement OR cold knife excision OR local excision) AND (office OR office visit OR office visits OR office procedure OR office procedures OR Ambulatory Surgical Procedures OR Ambulatory surgical procedure OR ambulatory surgery OR ambulatory surgeries OR outpatient surgery OR outpatient surgeries OR day surgery OR day surgeries OR ambulatory care OR operating room OR operating rooms OR operative surgical procedures OR operative surgical procedure OR ambulatory care OR office surgery OR office surgeries)

#### CINAHL

Date searched: 10/4/2019

Applied Database Supplied Limits: n/a

Number of Results: 11

#### Full Search Strategy:

(recurrent respiratory papillomatosis OR laryngeal papilloma OR laryngeal papillomas OR respiratory tract infection OR respiratory tract infections OR papillomavirus infection OR papillomavirus infections OR larynx papillomatosis OR benign respiratory tract tumor OR benign respiratory tract tumors) AND (KTP laser OR KTP lasers OR solid-state laser OR solid-state lasers OR potassium titanyl phosphate laser OR potassium titanyl phosphate lasers OR carbon dioxide laser OR carbon dioxide lasers OR gas laser OR gas lasers OR CO2 laser OR CO2 lasers OR pulsed dye laser OR pulsed dye lasers OR dye laser OR dye lasers OR laser coagulation OR laser surgery OR laser surgeries OR microdebrider OR otorhinolaryngology microdebrider OR debridement OR cold knife excision OR local excision) AND (office OR office visit OR office visits OR office procedure OR office procedures OR Ambulatory Surgical Procedures OR Ambulatory surgical procedure OR ambulatory surgery OR ambulatory surgeries OR outpatient surgery OR outpatient surgeries OR day surgery OR day surgeries OR ambulatory care OR operating room OR operating rooms OR operative surgical procedures OR operative surgical procedure OR ambulatory care OR office surgery OR office surgeries)

#### Cochrane Library

Date searched: 10/4/2019

Applied Database Supplied Limits: n/a

Number of Results: 16

Full Search Strategy:

(recurrent respiratory papillomatosis OR laryngeal papilloma OR laryngeal papillomas OR respiratory tract infection OR respiratory tract infections OR papillomavirus infection OR papillomavirus infections OR larynx papillomatosis OR benign respiratory tract tumor OR benign respiratory tract tumors) AND (KTP laser OR KTP lasers OR solid-state laser OR solid-state lasers OR potassium titanyl phosphate laser OR potassium titanyl phosphate lasers OR carbon dioxide laser OR carbon dioxide lasers OR gas laser OR gas lasers OR CO2 laser OR CO2 lasers OR pulsed dye laser OR pulsed dye lasers OR dye laser OR dye lasers OR laser coagulation OR laser surgery OR laser surgeries OR microdebrider OR otorhinolaryngology microdebrider OR debridement OR cold knife excision OR local excision) AND (office OR office visit OR office visits OR office procedure OR office procedures OR Ambulatory Surgical Procedures OR Ambulatory surgical procedure OR ambulatory surgery OR ambulatory surgeries OR outpatient surgery OR outpatient surgeries OR day surgery OR day surgeries OR ambulatory care OR operating room OR operating rooms OR operative surgical procedures OR operative surgical procedure OR ambulatory care OR office surgery OR office surgeries)

Web of Science

Date searched: 10/4/2019

Applied Database Supplied Limits: n/a

Number of Results: 133

Full Search Strategy:

(recurrent respiratory papillomatosis OR laryngeal papilloma OR laryngeal papillomas OR respiratory tract infection OR respiratory tract infections OR papillomavirus infection OR papillomavirus infections OR larynx papillomatosis OR benign respiratory tract tumor OR benign respiratory tract tumors) AND (KTP laser OR KTP lasers OR solid-state laser OR solid-state lasers OR potassium titanyl phosphate laser OR potassium titanyl phosphate lasers OR carbon dioxide laser OR carbon dioxide lasers OR gas laser OR gas lasers OR CO2 laser OR CO2 lasers OR pulsed dye laser OR pulsed dye lasers OR dye laser OR dye lasers OR laser coagulation OR laser surgery OR laser surgeries OR microdebrider OR otorhinolaryngology microdebrider OR debridement OR cold knife excision OR local excision) AND (office OR office visit OR office visits OR office procedure OR office procedures OR Ambulatory Surgical Procedures OR Ambulatory surgical procedure OR ambulatory surgery OR ambulatory surgeries OR outpatient surgery OR outpatient surgeries OR day surgery OR day surgeries OR ambulatory care OR operating room OR operating rooms OR operative surgical procedures OR operative surgical procedure OR ambulatory care OR office surgery OR office surgeries)

| <b>Principal author &amp; year</b> | <b>Selection</b> | <b>Comparability</b> | <b>Outcome</b> |
|------------------------------------|------------------|----------------------|----------------|
| Awad 2019                          | ***              |                      | *              |
| Burns 2007                         | **               |                      | **             |
| Del Signore 2016                   | *                |                      | *              |
| Elo 1988                           | **               |                      | **             |
| Franco 2002                        | **               |                      | **             |
| Hao-Chun 2017                      | **               |                      | **             |
| Koufman 2007                       | *                |                      | **             |
| Kuet 2013                          | **               |                      | ***            |
| Long 2003                          | *                |                      | **             |
| Miller 2017                        | ***              | **                   | **             |
| Mouadeb 2007                       | **               |                      | **             |
| Ossoff 1991                        | **               |                      | **             |
| Papaspyrou 2016                    | **               |                      | ***            |
| Rees 2007                          | ***              | *                    | ***            |
| Shapshay 2001                      | **               |                      | *              |
| Strong 1976                        | **               |                      | **             |
| Uloza 2000                         | **               |                      | **             |
| Valdez 2001                        | **               |                      | **             |

**Table 2a. Newcastle-Ottawa Assessment Scale for assessing the quality of non-randomized studies in a systematic review on outcomes of RRP treated in the office vs outcomes of RRP treated in the operating room**

| Principal author & year | Treatment Setting and Modality            | Sample Size | Percent Female (%) | Measures of Voice Outcome                                                                                                                                                                                                                                                                                                                  | Average age of patient | Mean Follow-up Period                | Disease Severity                                                                                                                                                         | Adjuvant Therapy Received |
|-------------------------|-------------------------------------------|-------------|--------------------|--------------------------------------------------------------------------------------------------------------------------------------------------------------------------------------------------------------------------------------------------------------------------------------------------------------------------------------------|------------------------|--------------------------------------|--------------------------------------------------------------------------------------------------------------------------------------------------------------------------|---------------------------|
| Awad 2019               | OR: coblation                             | 14          | 13.3               | Pretreatment vs posttreatment Voice Handicap Index (VHI): 47 vs 23.39 (p = 0.01198)<br><br>Grade, Roughness, Breathiness, Asthenia, Strain (GRBAS) score: 46.6% of patients were initially severely dysphonic; at final assessment 21.4% were severely dysphonic, 50% improved, 38.7% remained the same, and 14.3% worsened post-procedure | 55                     | 18 months                            | 6.7% current smokers, 20% former smokers<br>40% with laryngopharyngeal reflux<br>Pretreatment Reflux Symptom Index (RSI): 12.86<br>Posttreatment RSI: 14.14 (p = 0.7029) | none                      |
| Burns 2007              | OR: cold knife followed by KTP laser      | 37          | 43.2               | not mentioned                                                                                                                                                                                                                                                                                                                              |                        | 18 months                            | 93% with bilateral and anterior commissure involvement                                                                                                                   | not mentioned             |
| Del Signore 2016        | Office: KTP laser, Pulsed dye laser (PDL) | 34          |                    | not mentioned                                                                                                                                                                                                                                                                                                                              |                        | 4 years (retrospective chart review) |                                                                                                                                                                          | not mentioned             |

|               |                                                            |    |      |                                                                                                                                          |  |                                      |                                                                                                                                                              |                                                                                                                                                                                              |
|---------------|------------------------------------------------------------|----|------|------------------------------------------------------------------------------------------------------------------------------------------|--|--------------------------------------|--------------------------------------------------------------------------------------------------------------------------------------------------------------|----------------------------------------------------------------------------------------------------------------------------------------------------------------------------------------------|
| Elo 1988      | OR: CO2 laser                                              | 24 |      | not mentioned                                                                                                                            |  |                                      |                                                                                                                                                              | <p>8 received Isoprinosine (ISO) post-op, with RRP recurrence in 4/8 (50%)</p> <p>10 received ISO 2 days prior to surgery and for 8 more days post-op, with RRP recurrence in 3/10 (30%)</p> |
| Franco 2002   | OR: cold resection and/or CO2 laser vs PDL                 | 23 | 47.8 | not mentioned                                                                                                                            |  |                                      | 90% with bilateral disease<br>66% with anterior commissure involvement                                                                                       | not mentioned                                                                                                                                                                                |
| Hao-Chun 2017 | Office: CO2 laser                                          | 6  |      | not mentioned                                                                                                                            |  | 5 months                             |                                                                                                                                                              | not mentioned                                                                                                                                                                                |
| Koufman 2007  | OR: CO2 laser, PDL, thulium: yttrium-aluminum-garnet laser | 61 |      | not mentioned                                                                                                                            |  | 4 years (retrospective chart review) |                                                                                                                                                              | not mentioned                                                                                                                                                                                |
| Kuet 2013     | Office: KTP laser, PDL                                     | 17 |      | <p>Pretreatment VHI vs posttreatment VHI: 24.6 vs 15.3 (p = 0.03)</p> <p>Pretreatment vs posttreatment GRBAS: 8.4 vs 4.7 (p = 0.004)</p> |  | 18 months                            | <p>Pretreatment Derkay score: 4.9</p> <p>Posttreatment Derkay score: 2.5 (p = 0.0005)</p> <p>Pretreatment vs posttreatment GRBAS: 8.4 vs 4.7 (p = 0.004)</p> | <p>4 received cidofovir</p> <p><math>\frac{3}{4}</math> of these patients had dramatic reduction of papilloma with 4-5 injections of cidofovir at 2-week intervals</p>                       |

|                 |                                  |                    |       |                                                                                       |    |                                      |                                                         |                                                                                                                                                                           |
|-----------------|----------------------------------|--------------------|-------|---------------------------------------------------------------------------------------|----|--------------------------------------|---------------------------------------------------------|---------------------------------------------------------------------------------------------------------------------------------------------------------------------------|
| Long 2003       | OR: CO2 laser                    | 4                  | 0     | not mentioned                                                                         | 44 | 6 years (retrospective chart review) | Glottic site disease<br>Average age of onset of RRP: 42 | none                                                                                                                                                                      |
| Miller 2017     | OR: microdebrider<br>Office: PDL | 17                 | 94.12 | not mentioned                                                                         | 62 |                                      |                                                         | cidofovir not routinely injected during OR procedure                                                                                                                      |
| Mouadeb 2007    | Office: PDL                      | 21                 |       | Pretreatment vs posttreatment VHI-10 (including non-RRP patients): 21 vs 14 (p=0.001) |    | 2 years (retrospective chart review) |                                                         | not mentioned                                                                                                                                                             |
| Ossoff 1991     | OR: CO2 laser                    | 8                  |       | not mentioned                                                                         |    | 4 years (retrospective chart review) |                                                         | not mentioned                                                                                                                                                             |
| Papaspyrou 2016 | OR: CO2 laser, cold knife        | 60                 | 31.7  | not mentioned                                                                         | 50 | 63 months                            | 86.2% HPV-positive                                      | adjuvant therapy received during initial treatment and during follow-up: 4 received photodynamic therapy, 4 cidofovir, 3 interferon-alpha, 2 mitomycin, 1 HPV vaccination |
| Rees 2007       | OR: laser<br>Office: PDL         | OR: 6<br>Office: 7 |       | not mentioned                                                                         | 56 | 3 years (retrospective chart review) |                                                         | excluded                                                                                                                                                                  |
| Shapshay 2001   | OR: PDL                          | 12                 | 25    | not mentioned                                                                         | 34 |                                      |                                                         | not mentioned                                                                                                                                                             |
| Strong 1976     | OR: CO2 laser                    | 29                 |       | not mentioned                                                                         |    |                                      |                                                         | not mentioned                                                                                                                                                             |



|             |                                |    |      |               |    |           |                                                                                                                       |               |
|-------------|--------------------------------|----|------|---------------|----|-----------|-----------------------------------------------------------------------------------------------------------------------|---------------|
| Uloza 2000  | OR: endolaryngeal microsurgery | 57 |      | not mentioned |    | 2 years   | 35% with a single papilloma, 65% with multiple papillomas, 5.3% with respiratory distress<br>Average age of onset: 34 | not mentioned |
| Valdez 2001 | OR: PDL                        | 8  | 12.5 | not mentioned | 34 | 11 months |                                                                                                                       | not mentioned |

**Table 3a. Available patient demographics from the 18 included studies on outcomes of RRP treated in the office vs outcomes of RRP treated in the operating room**

### Recurrence

#### 1. Operating Room (OR)

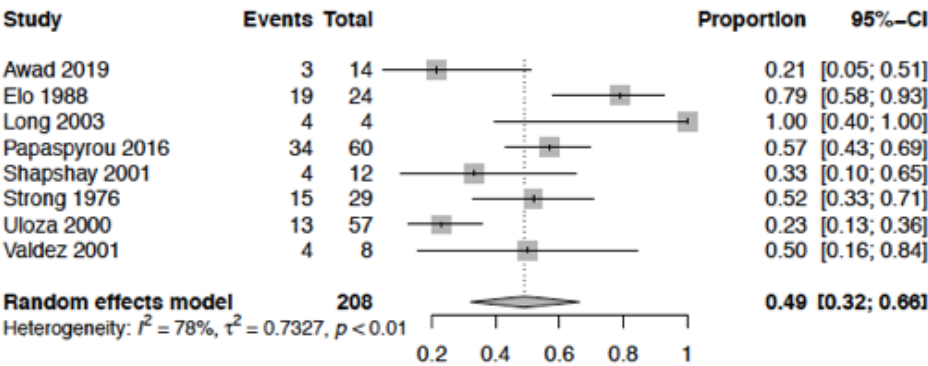

**Figure 1a. Weighted recurrence rate of RRP in patients who underwent treatment in the OR only (due to lack of recurrence data on office-based treatment)**

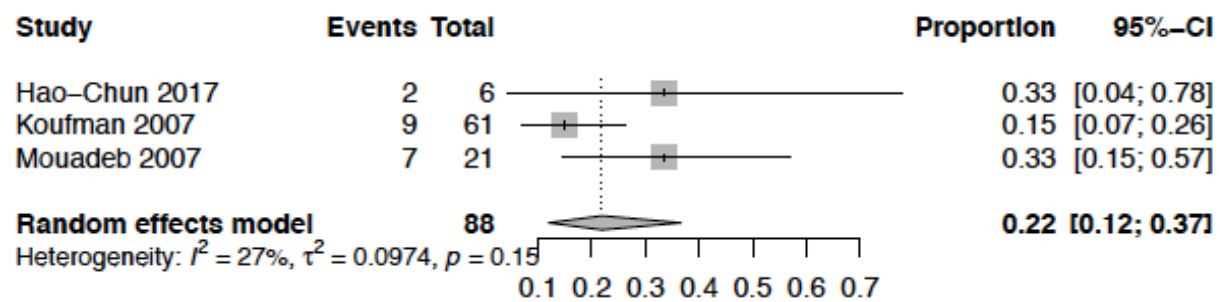

Figure 2a. Weighted mean complication rate for an office procedure undertaken for RRP that was too bulky to be treated in the office and required surgical treatment in the OR
